# Supplementary material for: MiR-103a-3p targets the 5′ UTR of GPRC5A in pancreatic cells
Source: PubMed Central journal article supplement — RNA. 2014 Sep;20(9):1431–9. doi: 10.1261/rna.045757.114 (PMC4138326; doi:10.1261/rna.045757.114), 2014-09
Supplement: supp_045757.114_SuppMaterial.pdf [file supp_045757.114_SuppMaterial.pdf]

## **SUPPLEMENTAL MATERIAL**

### **MiR-103a-3p targets the 5'UTR of GPRC5A in pancreatic cells**

**HONGLEI ZHOU and ISIDORE RIGOUTSOS**

Computational Medicine Center, Jefferson Alumni Hall, Suite #M81  
Thomas Jefferson University, 1020 Locust Street, Philadelphia, PA 19107.

Supp. Table 1. Primers and sequences.

|                                |                                                                                           |
|--------------------------------|-------------------------------------------------------------------------------------------|
| <b>GPRC5A primer</b>           | <b>RT-PCR</b>                                                                             |
|                                | Forward: GCTGCTCACAAAGCAACGAA                                                             |
|                                | Reverse: ATAGAGCGTGTCCCCTGTCT                                                             |
| <b>GPRC5A-5'UTR-CDS primer</b> |                                                                                           |
|                                | Forward: ATCAGCTAGCATTGTCGAGGCTTTAG                                                       |
|                                | Reverse: TTTCGCGGCCGCATCCCTTTGAGCTCCC                                                     |
| <b>GPRC5A-CDS primer</b>       |                                                                                           |
|                                | Forward: CACGGATCCAACGCCTTGCCACTAGGGT                                                     |
|                                | Reverse: TTTCGCGGCCGCATCCCTTTGAGCTCCC                                                     |
| <b>GPRC5A-S11 sequence</b>     |                                                                                           |
| S11WT                          | ACTGCTCGAGGCTGGCTTGTCCCGCTGGACTTGACGGCGGAGCTGCTGCAATCTCGCGGGCTGGGC<br>CCTTGGCGGCCGCAGTC   |
| S11MT                          | ACTGCTCGAGGCTGGCTTGTCCCGCTGGACTTGACGGCGGATATTCTGCAATCTCGCGGGCTGGGC<br>CCTTGGCGGCCGCAGTC   |
| <b>GPRC5A-S12 sequence</b>     |                                                                                           |
| S12WT                          | ACTGCTCGAGGCACTAATGGTGCCTGTCTAGACTCTGACAGGTGGAGCTGCTGAGCTAACTACGGA<br>CCTGGTGGCGGCCGCAGTC |
| S12MT                          | ACTGCTCGAGGCACTAATGGTGCCTGTCTAGACTCTGACAGGTGGATATTCTGAGCTAACTACGGA<br>CCTGGTGGCGGCCGCAGTC |
| <b>GAPDH primer</b>            | <b>RT-PCR</b>                                                                             |
|                                | Forward: GAAAGCCTGCCGGTGAATAA                                                             |
|                                | Reverse: AGGAAAAGCATCACCCGAG                                                              |

## SUPPLEMENTAL FIGURE CAPTIONS

**Supp. Figure 1. MiR-103a-3p abundance affects both GPRC5A mRNA and protein levels.** A: Rna22 predicts two miR-103a-3p binding sites, S11 and S12, in GPRC5A's 5'UTR. MiR-103a-3p expression level is changed after ectopic expression of pre-miR-103a-3p or Anti-miR-103a-3p. Taqman-for-microRNA assay was performed on cells transfected with pre-miR-103a-3p. Cells treated with pre-miR-scrambles were tested in parallel as control. Result shows that transfection leads to a nearly 1000x increase in the abundance of mature miR-103a-3p. B: Taqman-for-microRNA assay was performed on cells transfected with Anti-miR-103a-3p. Cells treated with Anti-miR-scramble were tested in parallel as control. Result shows that transfection leads to a nearly 10x decrease in the abundance of mature miR-103a-3p. All shown data are mean±sd. \* P<0.05, \*\* P<0.01, \*\*\* P<0.001, n=3. U6, U6 snRNA. U6 is used as internal control.

**Supp. Figure 2. GPRC5A is directly targeted by miR-103a-3p at its 5'UTR.** A: The diagram (drawn to scale) shows the second predicted miR-103a-3p binding site (S12) within the 5'UTR of GPRC5A and the sequences of S12 wild type (S12WT, top) and mutant (S12MT, bottom) used in this study. B: Luciferase activity in MIA PaCa-2 cells upon co-transfection with indicated reporter constructs and miR-103a-3p. C: Luciferase activity in MIA PaCa-2 cells upon co-transfection with indicated reporter constructs and miR-103a-3p inhibitors. D: Luciferase activity in MIA PaCa-2 cells upon transfection of indicated reporter constructs and miR-103a-3p inhibitors. Shown data are mean±sd. \* P<0.05, \*\* P<0.01, \*\*\* P<0.001, n=3. S12WT, psiCHECK-2 vector containing miR-103a-3p binding site 2; S12MT, psiCHECK-2 vector containing mutant miR-103a-3p binding site 2.

**Supp. Figure 3. Scheme of GPRC5A over-expression vector.** A: The diagram shows the GPRC5A cDNA (5'UTR, CDS and 3'UTR). B: The diagram shows the GPRC5A 5'UTR and CDS regions that are cloned into the pcDNA3.1 vector with NheI and NotI as the restriction sites. C: The diagram shows the GPRC5A CDS region that is cloned into the pcDNA3.1 vector with NheI and NotI as the restriction sites.

**Supp. Figure 4. Scheme of GPRC5A 5'UTR binding site over-expression vector.** A: The diagram shows the GPRC5A 5'UTR. The blue and red-brown segments represent the miR-103a-3p binding sites 1 and 2, respectively. B: The diagram shows our 'sponge' S11WTL that contains 10 tandem copies of binding site 1 (S11WT) cloned into the pcDNA3.1 vector with NheI and NotI as the restriction sites. C: The diagram shows our 'control-sponge' S11MTL that contains 10 tandem copies of the mutant binding site 1 (S11MT) cloned into the pcDNA3.1 vector with NheI and NotI as the restriction sites.

**Supp. Figure 5. Over-expression of 5'UTR MRE decreases miR-103a-3p levels and increases GPRC5A mRNA levels.** A: Increase in GPRC5A mRNA levels is promoted by over-expression of the wild type sponge compared to the control sponge in HPNE cells. B: Increase in GPRC5A protein levels is promoted by over-expression of the wild type sponge compared to the control sponge in HPNE cells. C: Quantification result of Supp. Figure 5B. D: Increase in GPRC5A mRNA levels is promoted by over-expression of a luciferase construct containing the single copy of wild type sponge (S12WT) compared to the control sponge (S12MT) in HPNE cells. All shown data are mean±sd. \* P<0.05, \*\* P<0.01, \*\*\* P<0.001, n=3. GAPDH, glyceraldehyde-3-phosphate dehydrogenase; U6, U6 snRNA; GAPDH and U6 are used as internal controls. S11WTL, pcDNA vector containing 10 tandem copies of the wild type miR-103a-3p binding site S11; S11MTL, pcDNA vector containing 10 tandem copies of the mutant miR-103a-3p binding site S11. S12WT, psiCHECK-2 vector containing the miR-103a-3p binding site S12; S12MT, psiCHECK-2 vector containing the mutant miR-103a-3p binding site S12.

**Supplemental Figure 6. GPRC5A's 5'UTR alone can function as a decoy for miR-103a-3p.** A: GPRC5A mRNA levels were tested by RT-PCR in HPNE cells treated with Pre-miR-103a-3p in addition to co-transfecting with GPRC5A-S11WTL or GPRC5A-S11MTL. B: GPRC5A protein levels were tested by Western Blots in HPNE cells treated with Pre-miR-103a-3p in addition to co-transfecting with GPRC5A-S11WTL or GPRC5A-S11MTL. C: Quantification result of supp.Fig.6B. All shown data are mean±sd. \* P<0.05, \*\* P<0.01, \*\*\* P<0.001, n=3. GAPDH, glyceraldehyde-3-phosphate dehydrogenase; GAPDH and Actin are internal controls. S11WTL, pcDNA vector containing 10 tandem copies of miR-103a-3p binding site S11; S11MTL, pcDNA vector containing 10 tandem copies of mutant miR-103a-3p binding site S11.

**Supp. Figure 7. Over-expression of 5'UTR MRE increases GPRC5A mRNA levels in different cell lines.** A: GPRC5A mRNA levels increased when we over-expressed the wild type 5'UTR MRE (S12WT) compared to the mutant site in Panc-1 cells. B: GPRC5A protein levels increased when we over-expressed wild type 5'UTR MREs (S11WTL and S12WT) compared to the mutant site in HEK-293T cells. C: Quantification result of Supp. Figure 6C. All shown data are mean±sd. \* P<0.05, \*\* P<0.01, \*\*\* P<0.001, n=3. GAPDH, glyceraldehyde-3-phosphate dehydrogenase; GAPDH and Actin are used as internal controls. S12WT, psiCHECK-2 vector containing the miR-103a-3p binding site S12; S12MT, psiCHECK-2 vector containing the mutant miR-103a-3p binding site 2.
